# Supplementary figures and images for: Hidden polymorphism of FAPbI3 discovered by Raman spectroscopy
Source: Royal Society of Chemistry journal article supplement (doi:10.1039/d1cp00102g), 2021-01-01

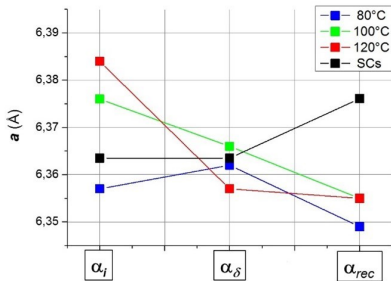

Supplement: d1cp00102g12.pdf [file d1cp00102g12.pdf]

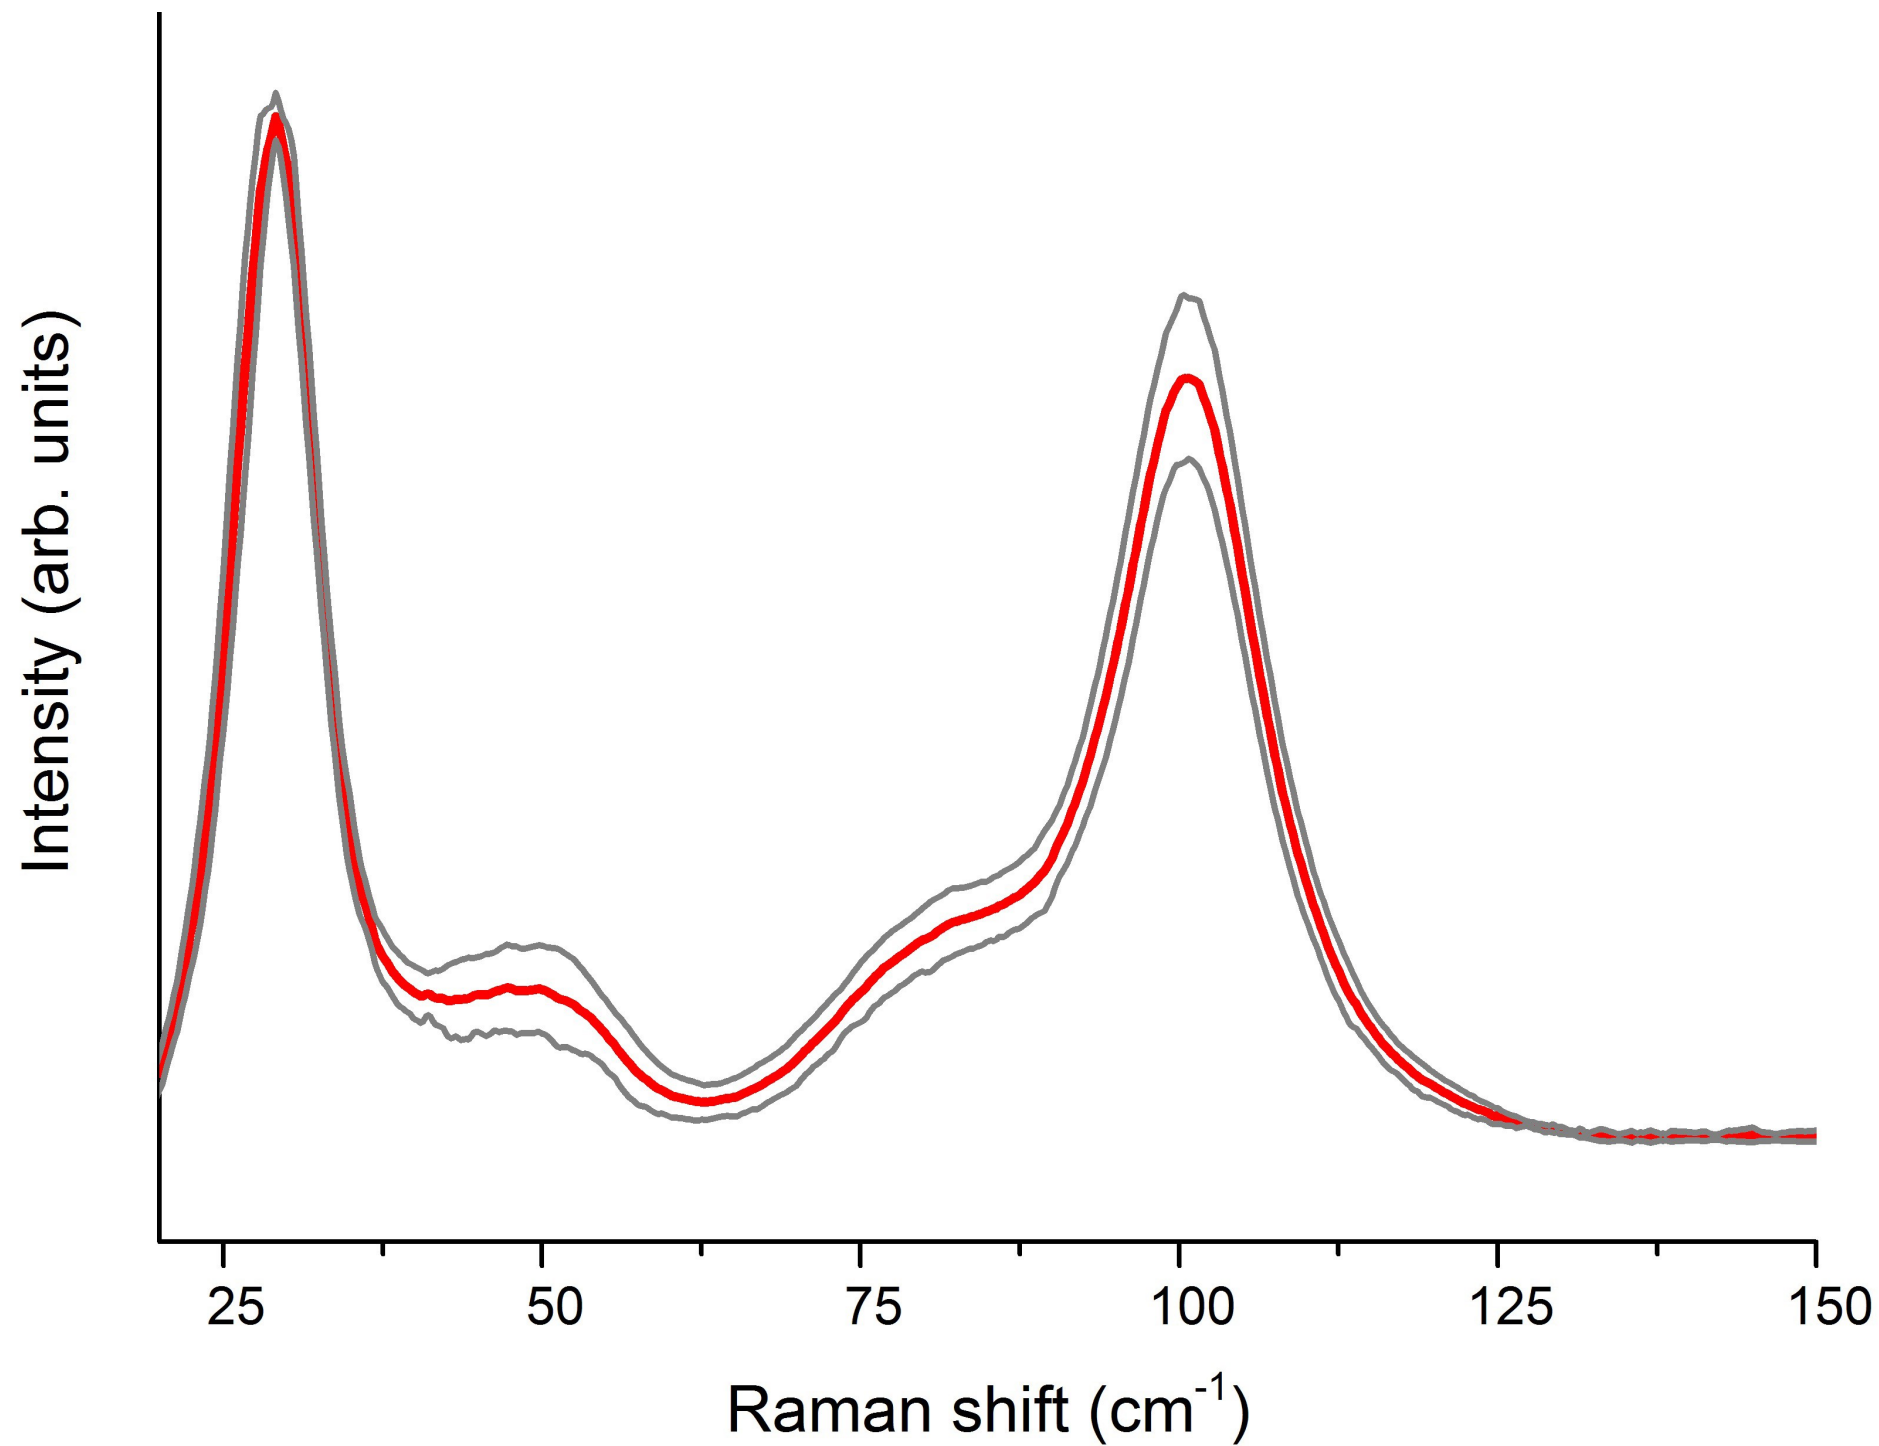

Supplement: d1cp00102g2.pdf [file d1cp00102g2.pdf]

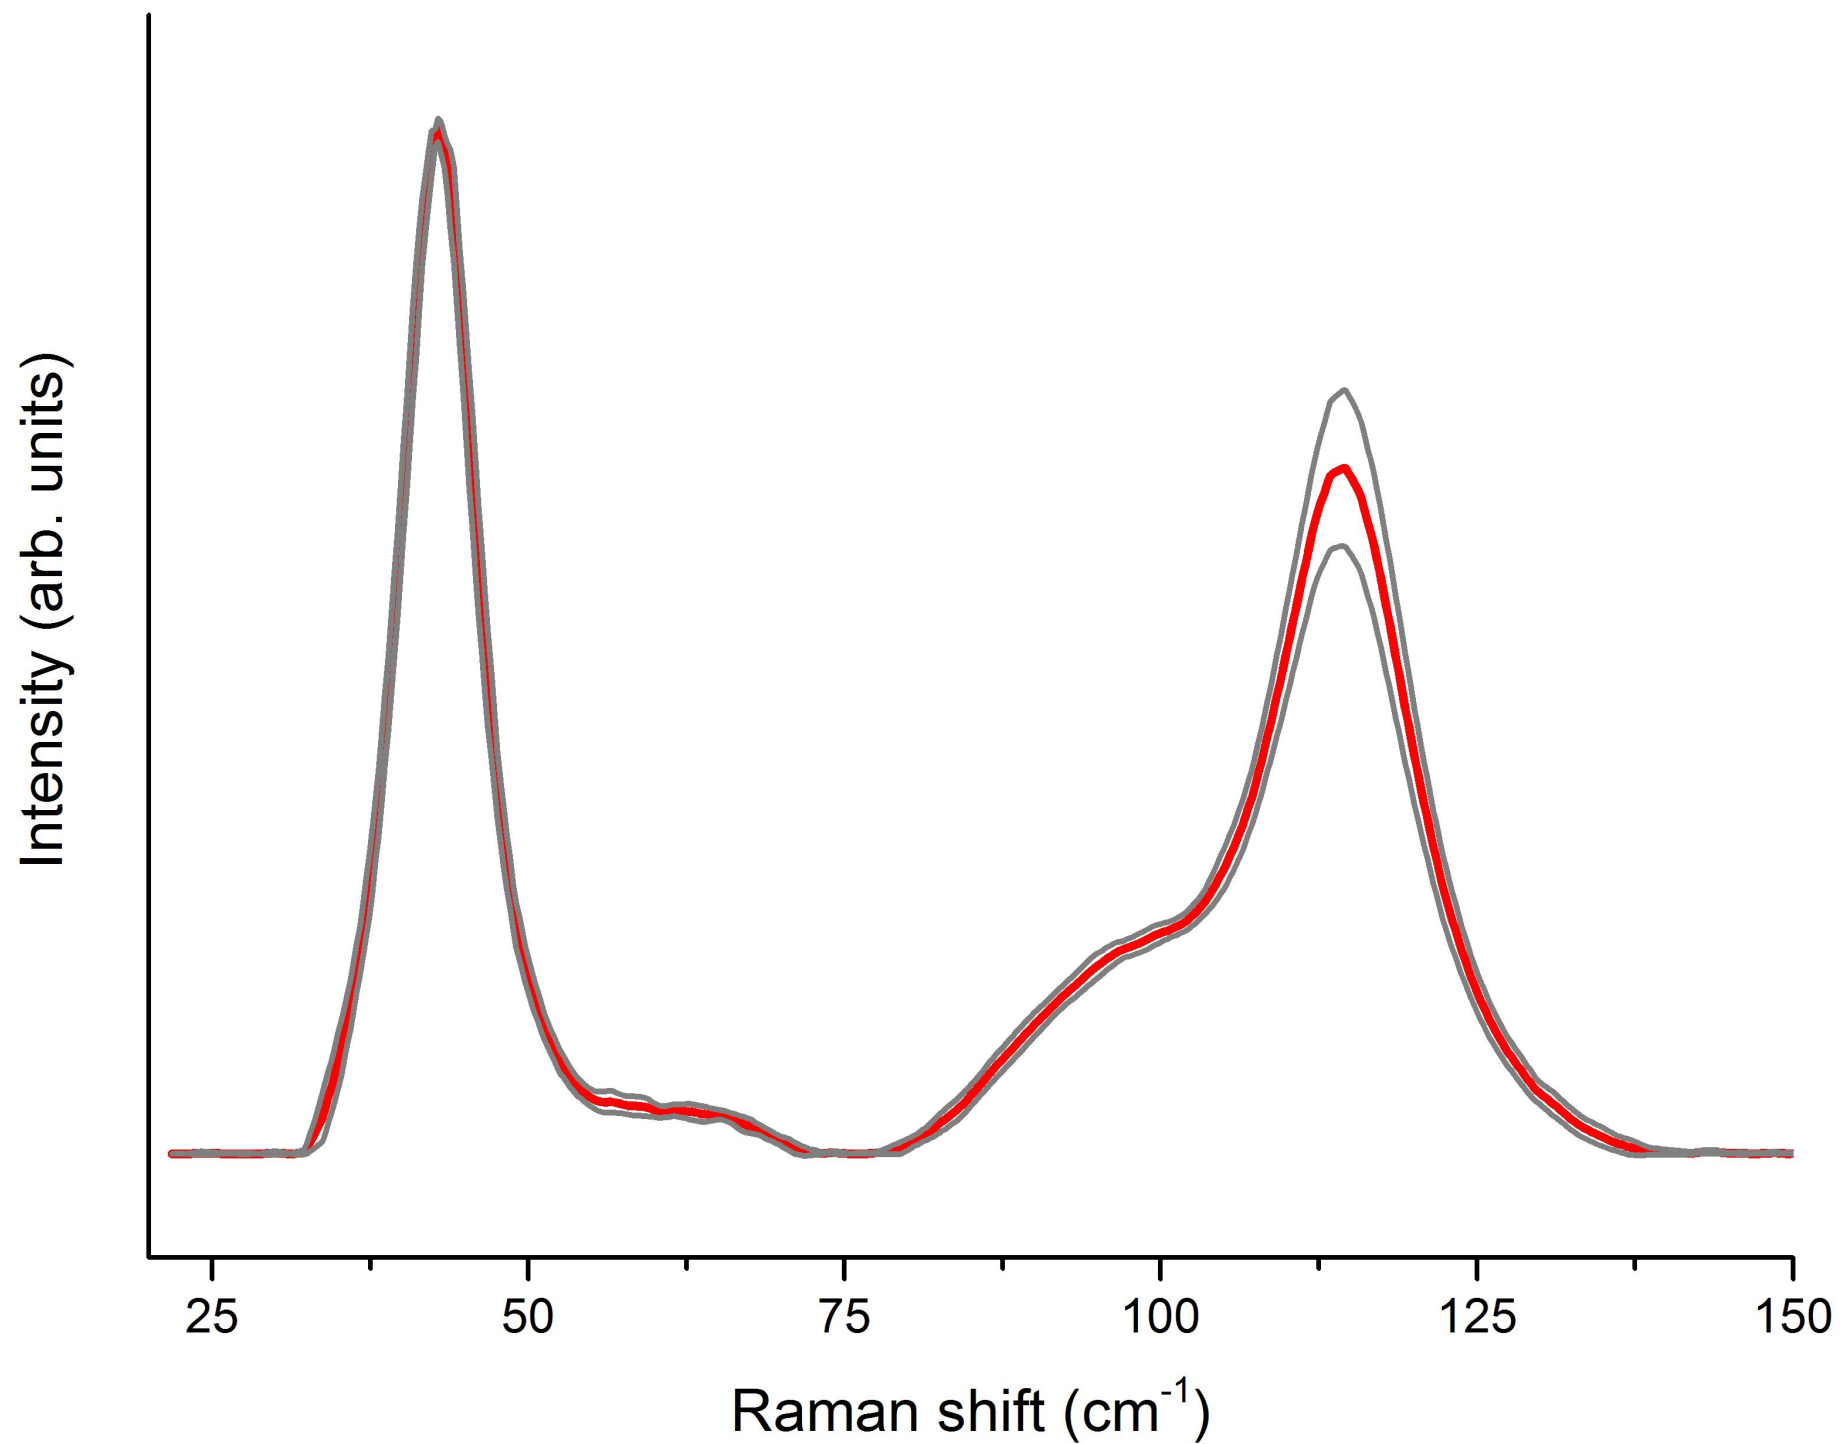

Supplement: d1cp00102g4.pdf [file d1cp00102g4.pdf]

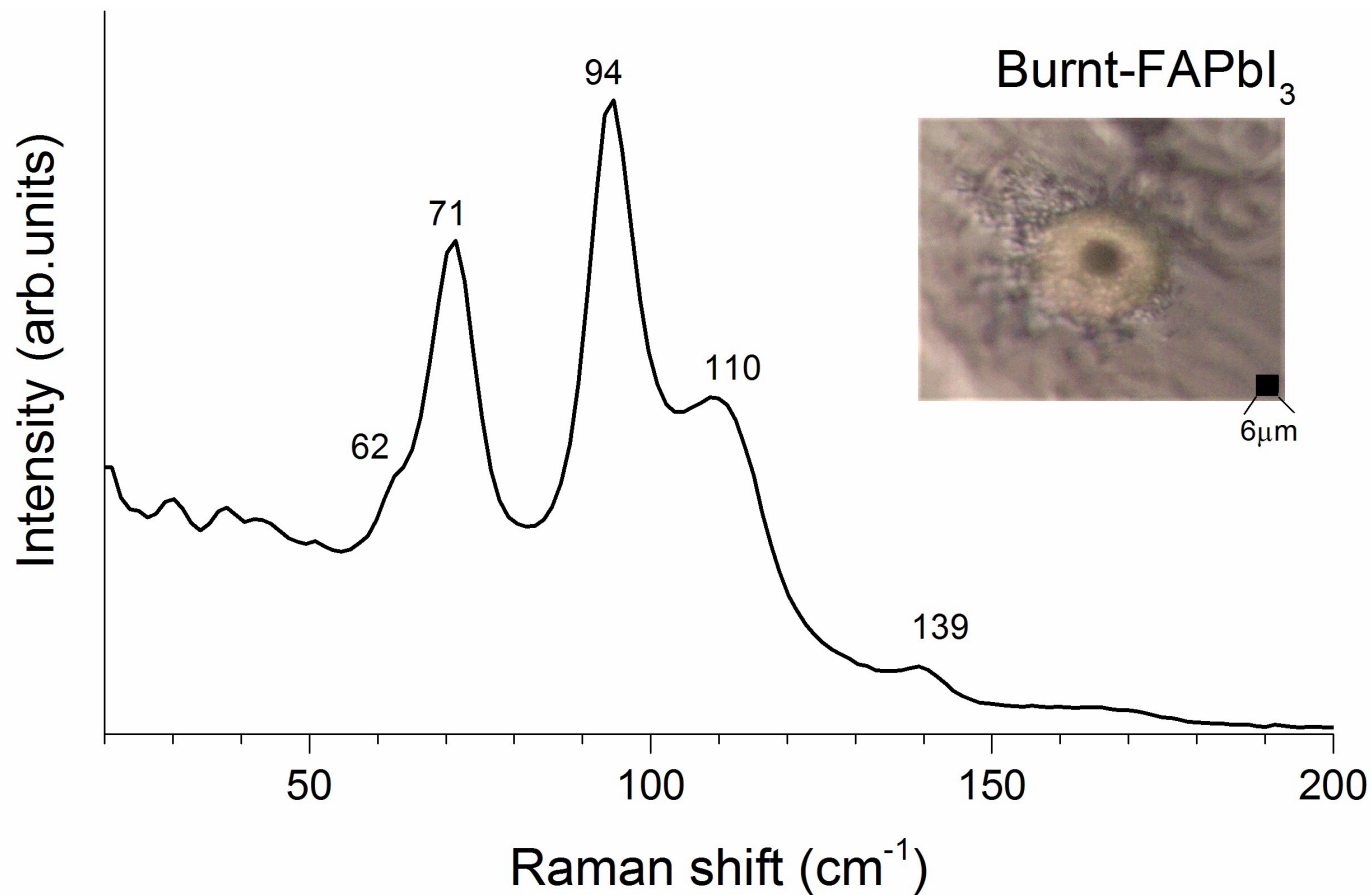

Supplement: d1cp00102g5.pdf [file d1cp00102g5.pdf]

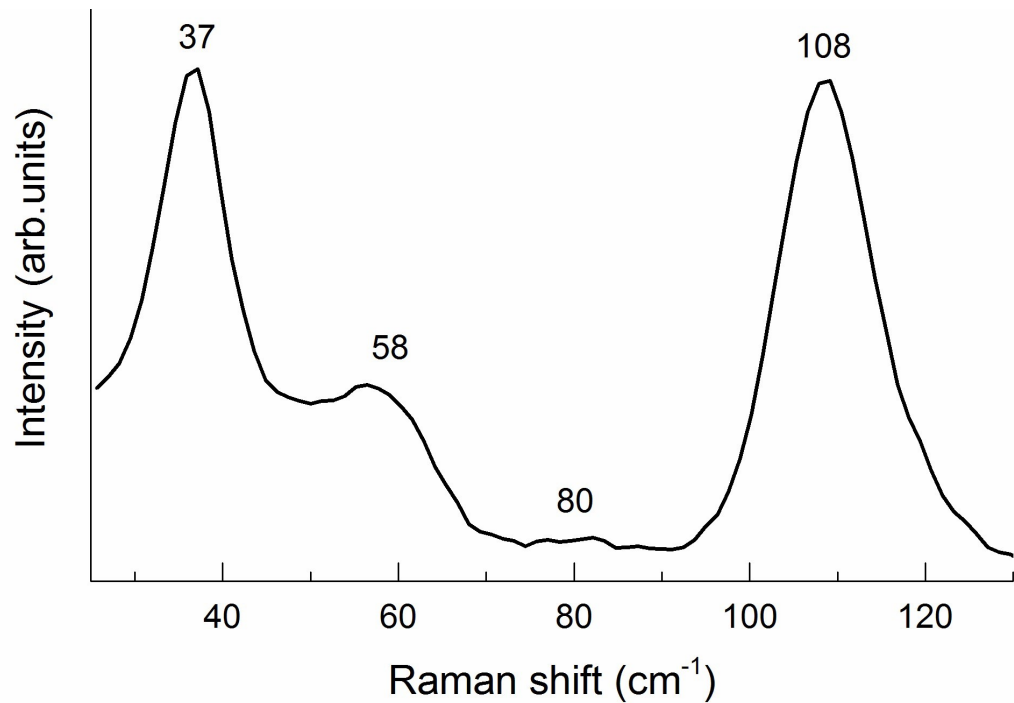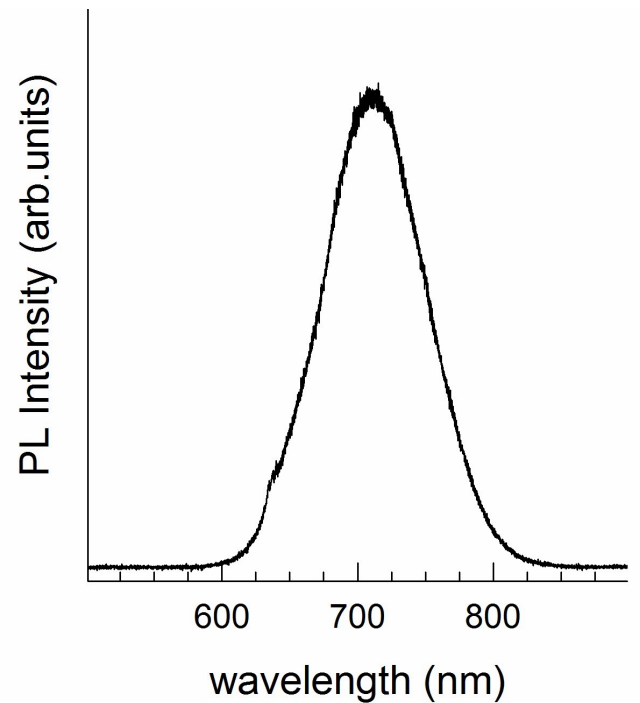

Supplement: d1cp00102g7.pdf [file d1cp00102g7.pdf]
